# Supplementary material for: Effect of Light Quality on Metabolomic, Ionomic, and Transcriptomic Profiles in Tomato Fruit
Source: MDPI journal article supplement (doi:10.3390/ijms232113288), 2022-10-31
Supplement: s1 [file s1]

Table S1. Differentially expressed genes involved in secondary metabolite biosynthesis between BLFR and RDFR.

| Entrez Gene ID | Product                                        | Comparative Analysis |
|----------------|------------------------------------------------|----------------------|
|                |                                                | BLFR/RDFR            |
| 101259725      | serine hydroxymethyltransferase 4              | 2.16 *               |
| 104644439      | dehydrodolichyl diphosphate synthase 2         | 2.06 *               |
| 101265978      | tropinone reductase homolog                    | -2.21 *              |
| 100191110      | glycerate dehydrogenase                        | 2.52 *               |
| 101250853      | fructose-bisphosphate aldolase                 | 2.61 *               |
| 101249960      | putative glucose-6-phosphate 1-epimerase       | 2.18 *               |
| 101255353      | very-long-chain enoyl-CoA reductase            | 3.16 *               |
| 101261422      | chlorophyllide a oxygenase, chloroplastic      | 2.26 *               |
| 101055519      | Hop-interacting protein THI032                 | 2.13 *               |
| 101244441      | chlorophyllide a oxygenase, chloroplastic-like | 2.46 *               |
| 101260852      | fructose-1,6-bisphosphatase 1, chloroplastic   | 2.42 *               |

\* indicates significant difference at  $p < 0.05$  by an independent  $t$ -test .  
A negative number in “Comparative Analysis” the value of RDFR/BLFR instead of BLFR/RDFR  
BLFR and RDFR refer to blue and red light-treated fruits, respectively.

Table S2. Differentially expressed genes involved in metal ion binding between BLFR and WHFR.

| Entrez_Gene_ID | Product                                                    | Comparative Analysis |           |           |
|----------------|------------------------------------------------------------|----------------------|-----------|-----------|
|                |                                                            | BLFR/RDFR            | BLFR/WHFR | RDFR/WHFR |
| 101254639      | probable pectate lyase 8                                   | -1.54                | 2.25 *    | 3.47 *    |
| 101257228      | peroxidase 51                                              | -2.48                | -2.07 *   | 1.20      |
| 101256516      | zinc finger protein ZAT5                                   | -2.03                | -3.70 *   | -1.82     |
| 100125906      | 2-oxoglutarate-dependent dioxygenase (ODD)                 | 1.80 *               | -6.61 *   | -11.93 *  |
| 543994         | lipoxygenase (LOX1.1)                                      | -1.23 *              | 2.11 *    | 2.60 *    |
| 101257518      | putative magnesium-protoporphyrin monomethyl ester cyclase | 1.72 *               | 2.38 *    | 1.39      |
| 101253681      | gibberellin 2-beta-dioxygenase 8-like                      | 1.19                 | -2.36 *   | -2.82 *   |
| 543975         | chlorophyll a/b-binding protein precursor (CAB4)           | 3.23 *               | 2.41 *    | -1.34     |
| 101243766      | chlorophyll a-b binding protein 13, chloroplastic (CAB13)  | 2.88 *               | 2.46 *    | -1.17     |
| 101253648      | peroxidase 42                                              | 1.00                 | -2.34 *   | -2.35 *   |
| 101266527      | chlorophyll a-b binding protein Cab9 (CAB9)                | 2.58                 | 2.59 *    | 1.01      |

\* indicates significant difference at  $p < 0.05$  by an independent  $t$ -test .  
Negative numbers in “Comparative Analysis” indicate the value of RDFR/BLFR, WHFR/BLFR, and WHFR/RDFR, instead of BLFR/RDFR, BLFR/WHFR, and RDFR/WHFR, respectively.  
BLFR, RDFR and WHFR refer to blue, red, and white light-treated fruits, respectively.

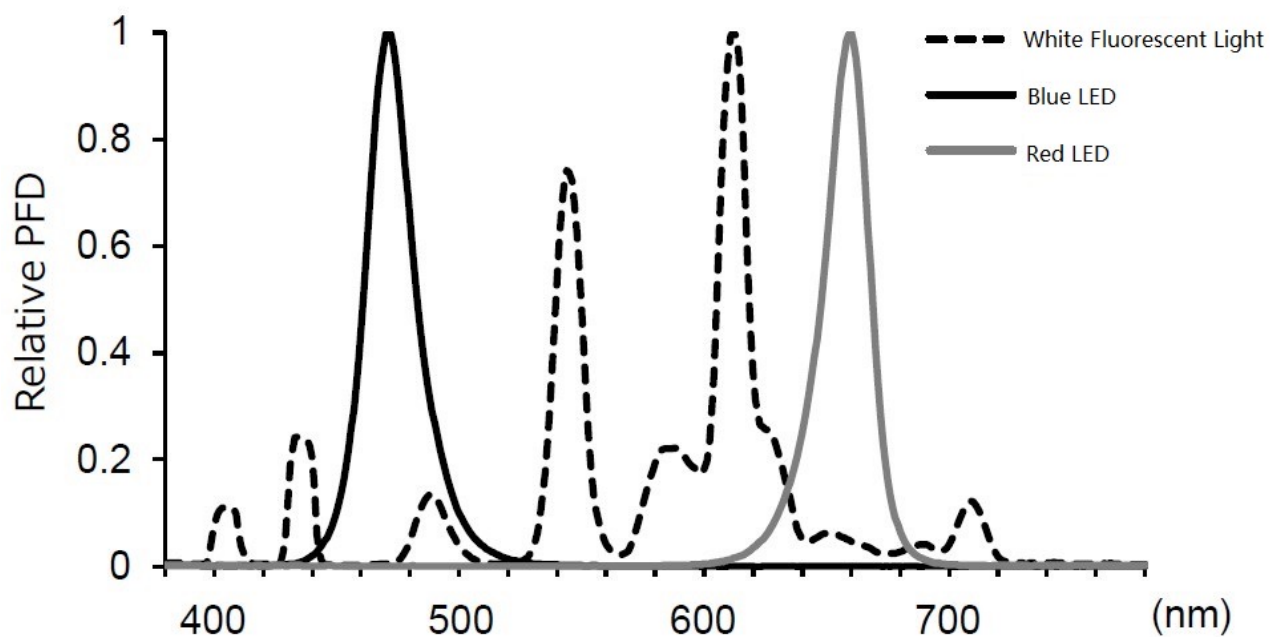

Figure S1. Fluorescent and LED light spectra.

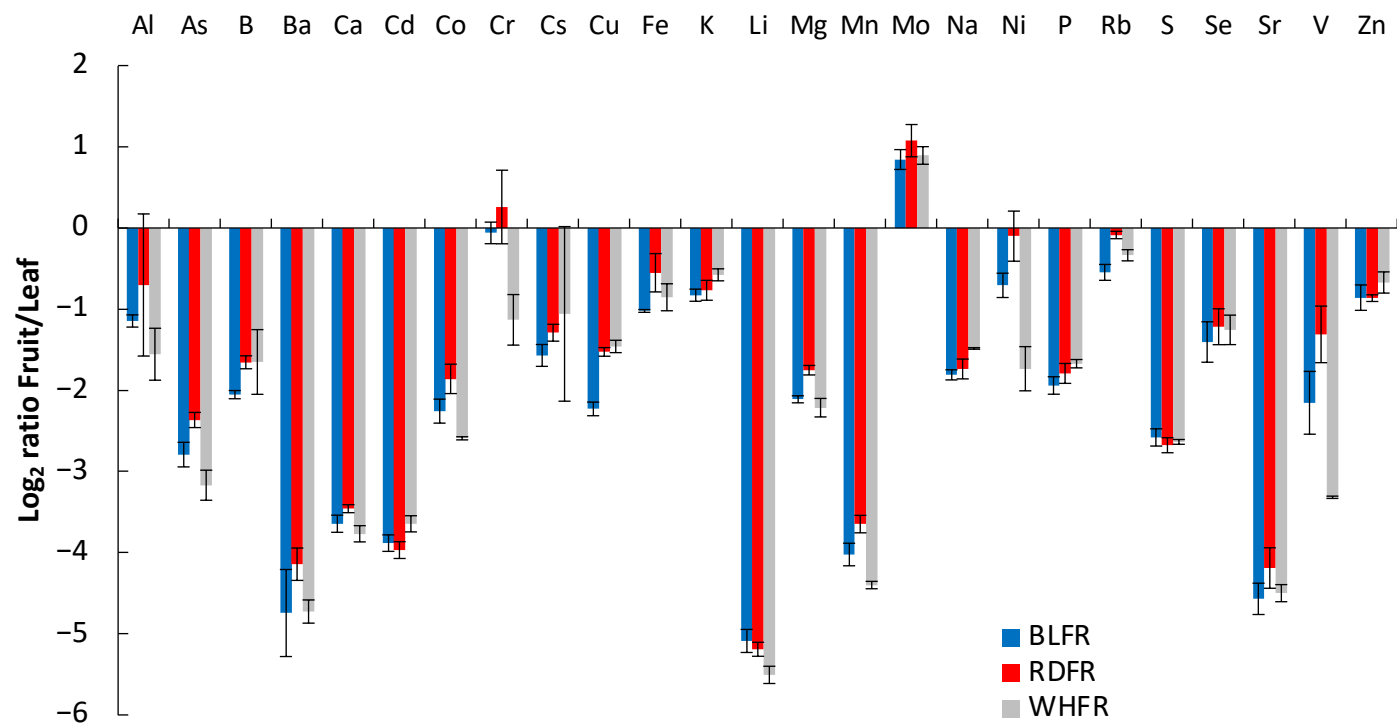

Figure S2. Ratio of elements in fruits vs. leaves. Results are means  $\pm$  SE ( $n = 3$ ). Different letters indicate significant differences at  $p < 0.05$  by Tukey-Kramer's test. BLFR, RDFR, and WHFR refer to blue light treatment, red light treatment, and white light treatments, respectively.

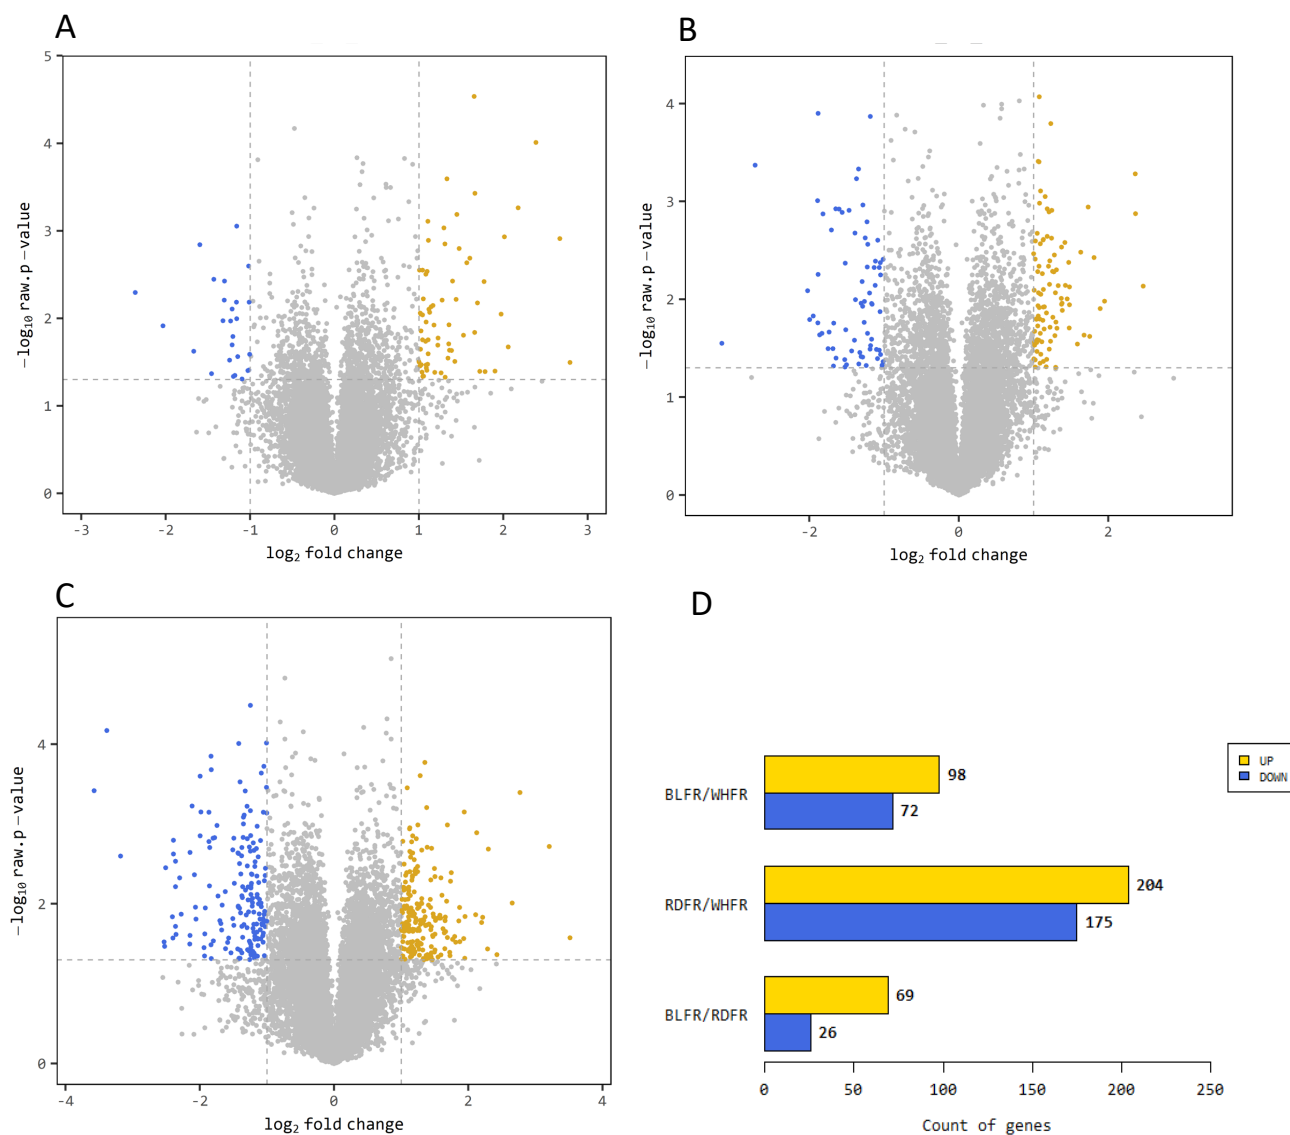

Figure S3. Differentially expressed genes are displayed in the volcano plot between BLFR and RDFR (A), BLFR and WHFR (B), RDFR and WHFR (C). Upregulated and downregulated genes ( $|\text{FC}| \geq 2$  and  $p < 0.05$ ) are displayed in the bar graph (D). BLFR, RDFR and WHFR refer to blue, red, and white light-treated fruits, respectively.
